# Supplementary material for: A new class of battery-free, mechanically powered, piezoelectric Ca5Ga6O14:Tb3+ phosphors with self-recoverable luminescence
Source: Royal Society of Chemistry journal article supplement (doi:10.1039/d2tc01554d), 2022-01-01
Supplement: d2tc01554d1.pdf [file d2tc01554d1.pdf]

## Supporting Information

### A New Class of Battery-free, Mechanically Powered, Piezoelectric $\text{Ca}_5\text{Ga}_6\text{O}_{14}:\text{Tb}^{3+}$ Phosphor with Self-recoverable Luminescence

Tao Hu<sup>a\*</sup>, Yan Gao<sup>a</sup>, Bo Wang<sup>a</sup>, Ting Yu<sup>a</sup>, Dawei Wen<sup>a</sup>, Yao Cheng<sup>b,c\*</sup>, Qingguang Zeng<sup>a</sup>

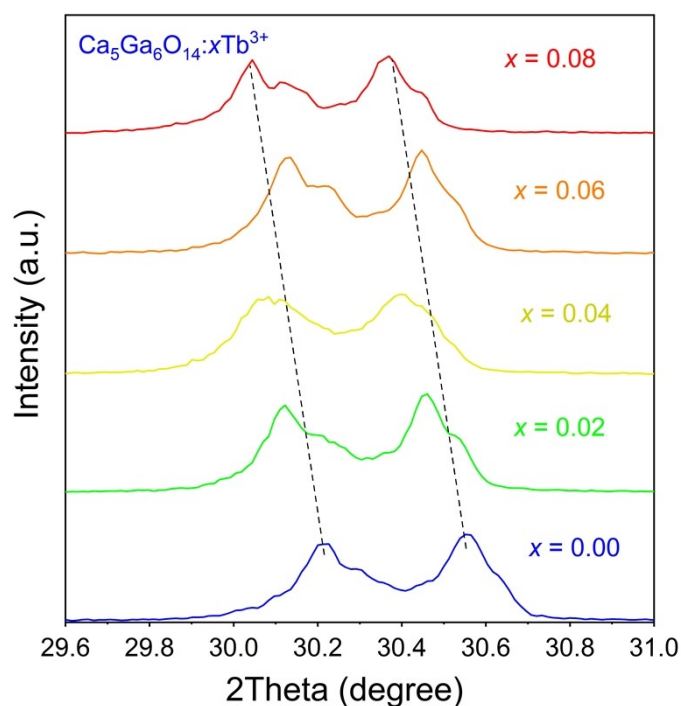

**Figure S1.** Enlarged view of the XRD diffraction peaks in the  $2\theta$  range of 29.6–31.0 degree.

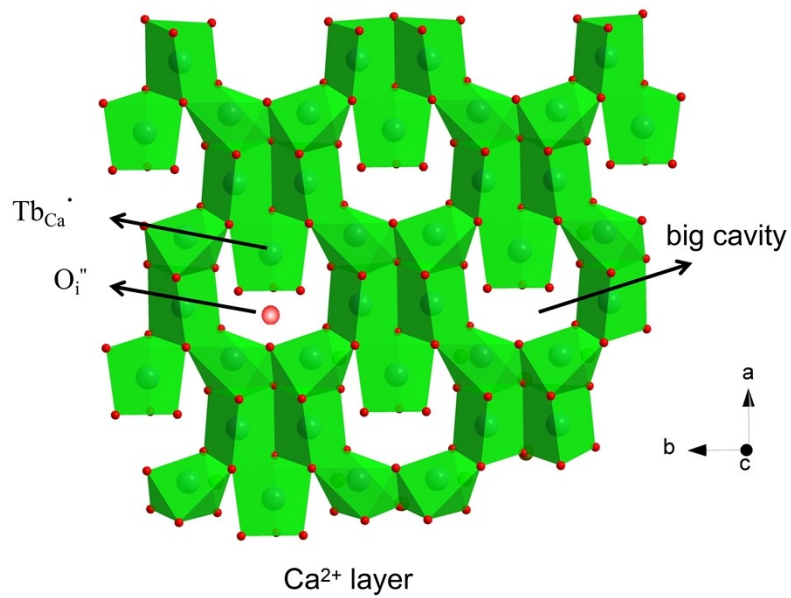

**Figure S2.** Monolayer crystal structure viewing along *c*-axis.

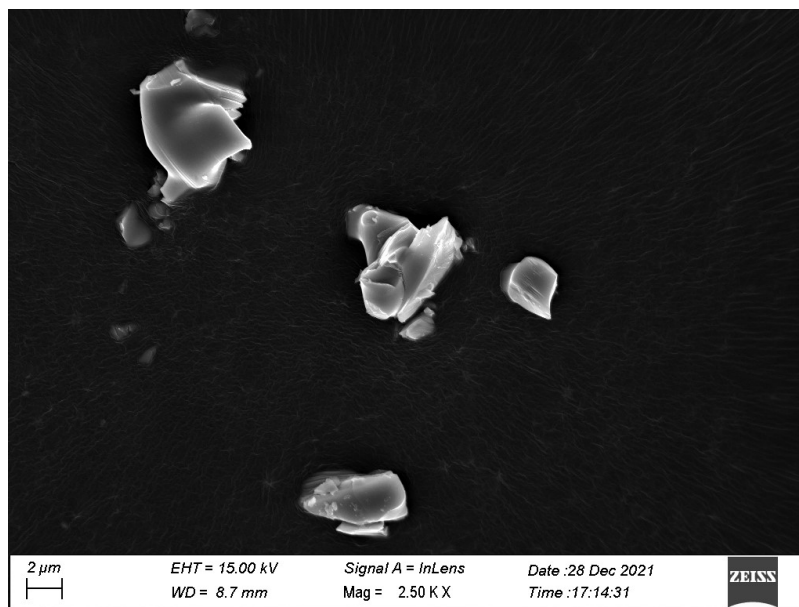

**Figure S3.** SEM image of the phosphor

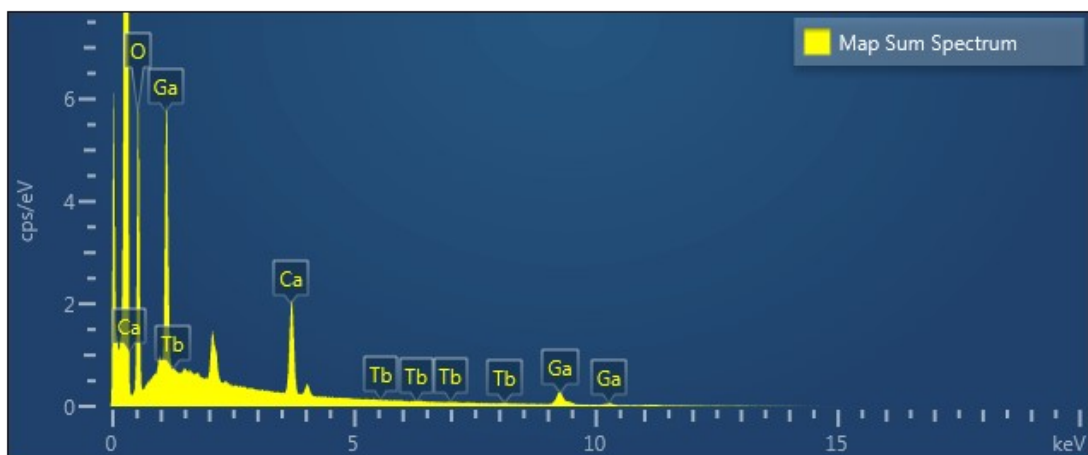

**Figure S4.** EDS analysis on the phosphor

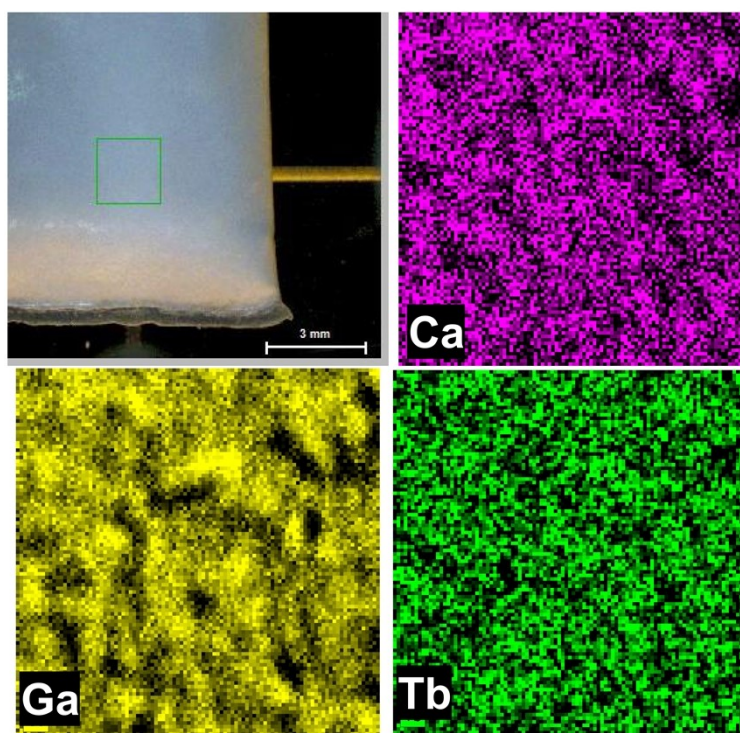

**Figure S5.** The distribution of Ca, Ga, and Tb<sup>3+</sup> ions measured by XRF

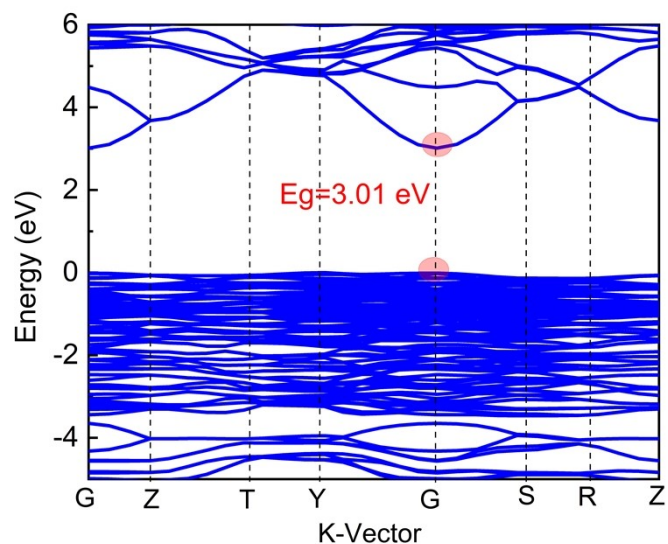

**Figure S6.** The calculated energy band structure of  $\text{Ca}_5\text{Ga}_6\text{O}_{14}$  host.

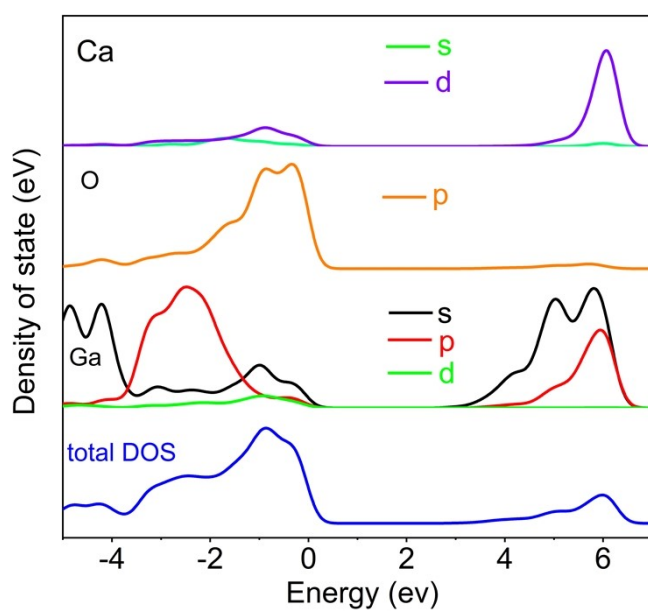

**Figure S7.** The partial (of Ca, Ga and O atom) and the total density state density of states for  $\text{Ca}_5\text{Ga}_6\text{O}_{14}$  host.

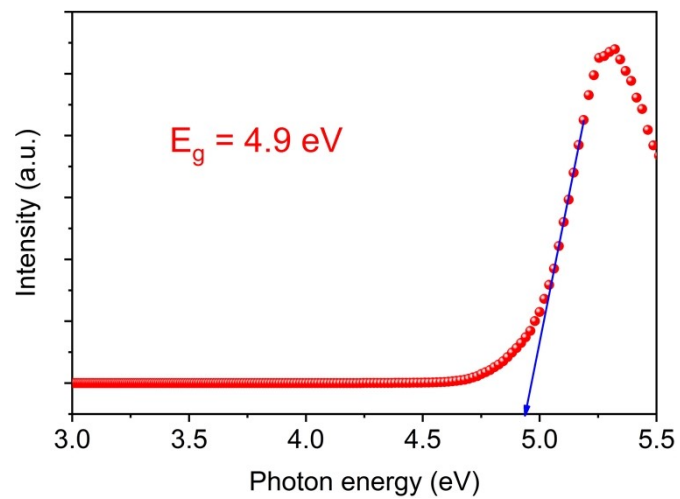

**Figure S8.** The calculated bandgap for  $\text{Ca}_5\text{Ga}_6\text{O}_{14}$

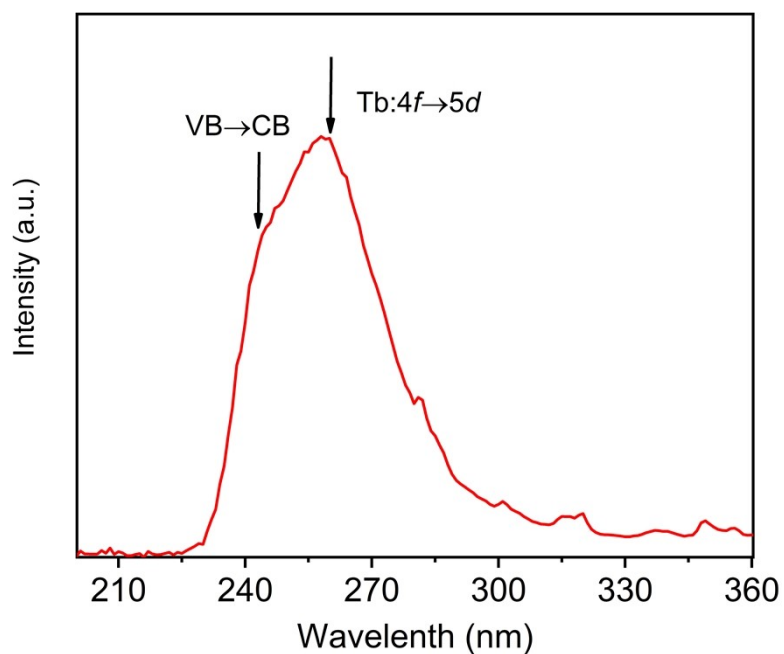

**Figure S9.** The PLE spectra of  $\text{Ca}_5\text{Ga}_6\text{O}_{14}:\text{Tb}^{3+}$  phosphor by monitoring at 543 nm emission

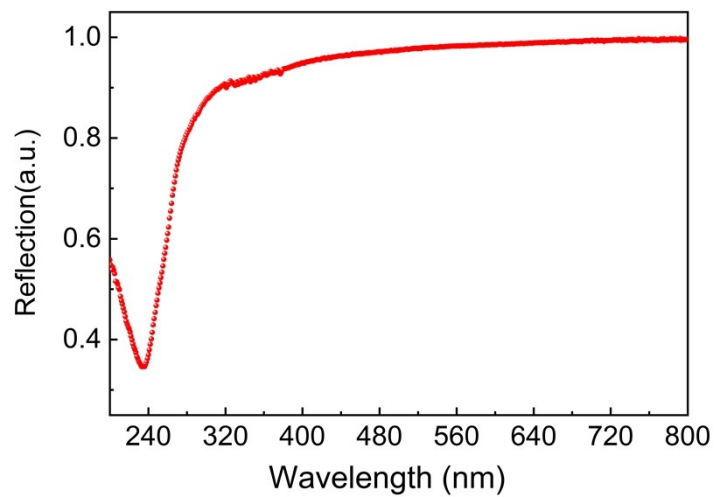

**Figure S10.** The absorption spectra of  $\text{Ca}_5\text{Ga}_6\text{O}_{14}:\text{Tb}^{3+}$  phosphor showing a strong absorption dip at 240 nm.

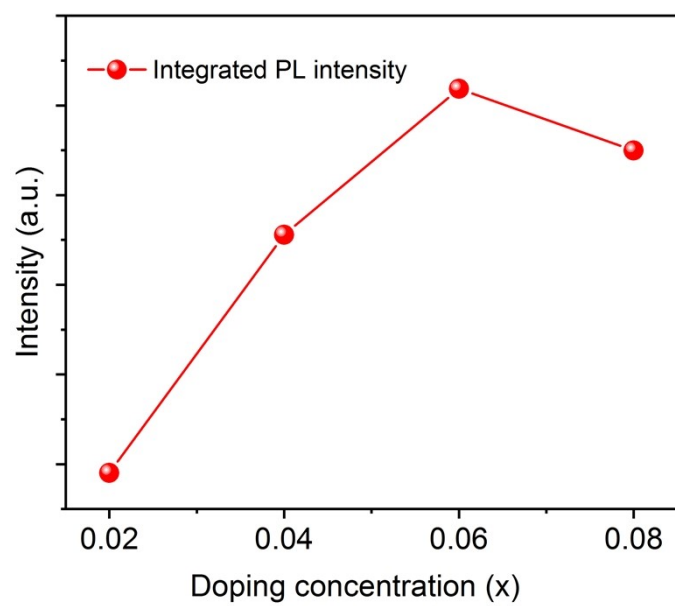

**Figure S11.** Integrated PL intensity of  $\text{Ca}_5\text{Ga}_6\text{O}_{14}:\text{xTb}^{3+}$  phosphor

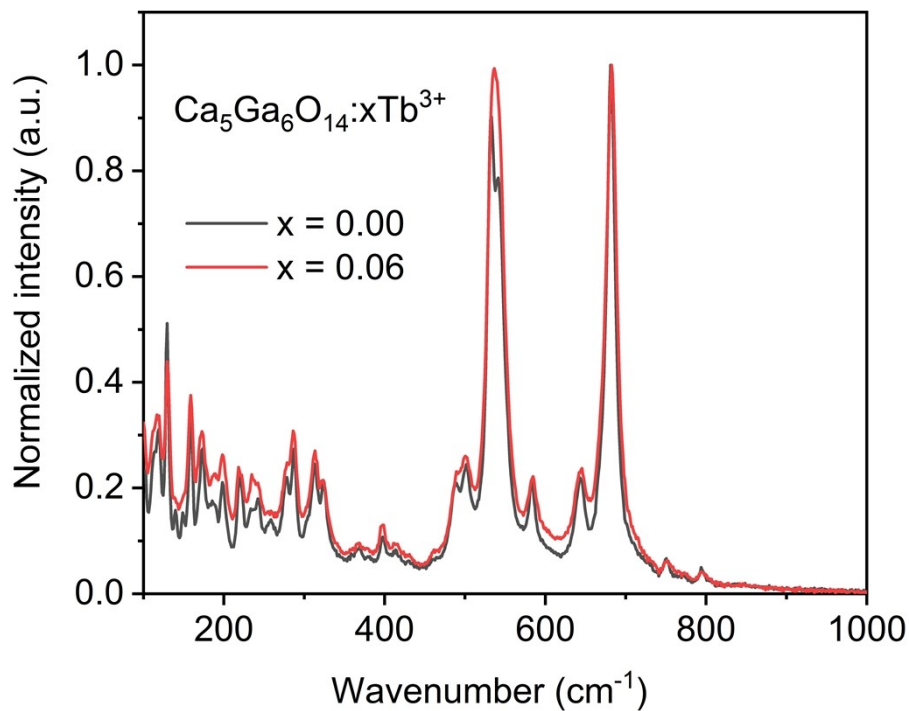

**Figure S12.** Raman spectra of  $\text{Ca}_5\text{Ga}_6\text{O}_{14}:\text{xTb}^{3+}$  ( $x = 0.00$  and  $0.06$ ) phosphors

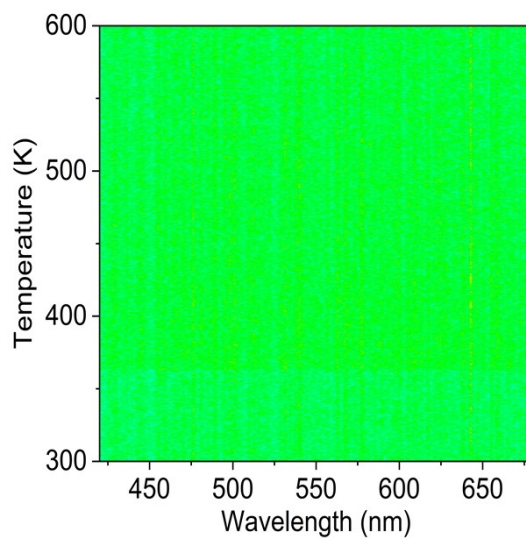

**Figure S13.** Temperature-wavelength-intensity plot of three-dimensional TL mapping of  $\text{Ca}_5\text{Ga}_6\text{O}_{14}:\text{6\%Tb}^{3+}$  phosphor after thermal annealing at 673 K.

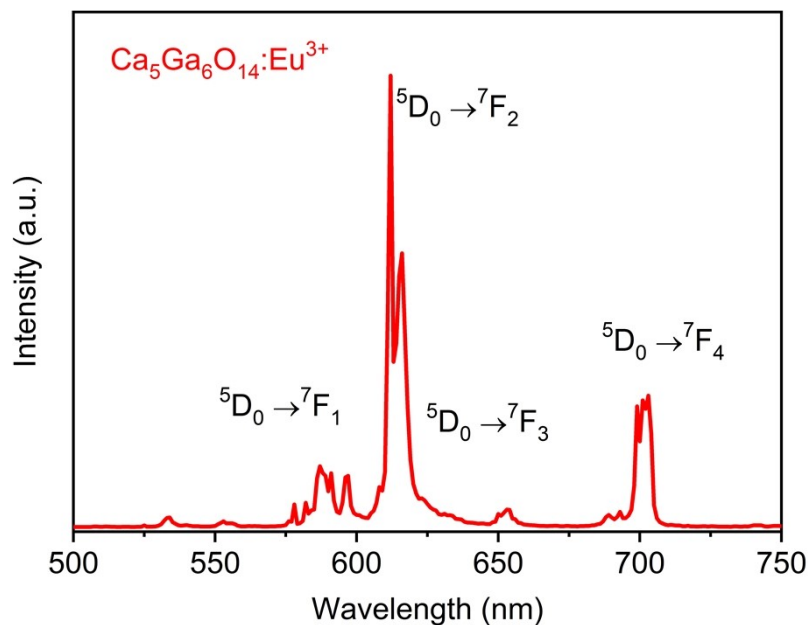

**Figure S14.** PL spectra of  $\text{Ca}_5\text{Ga}_6\text{O}_{14}:\text{Eu}^{3+}$  phosphor under 260 nm UV light excitation

**Table S1** EDS analysis on element compositions

| Element | Line Type | Apparent Concentration | k Ratio | Wt%    | Wt% Sigma | Atomic % |
|---------|-----------|------------------------|---------|--------|-----------|----------|
| O       | K series  | 6.65                   | 0.02237 | 51.16  | 0.26      | 79.28    |
| Ca      | K series  | 2.32                   | 0.02073 | 13.37  | 0.12      | 8.27     |
| Ga      | L series  | 3.21                   | 0.03007 | 34.65  | 0.22      | 12.32    |
| Tb      | L series  | 0.10                   | 0.00097 | 0.82   | 0.30      | 0.13     |
| Total:  |           |                        |         | 100.00 |           | 100.00   |

**Table S2** CIE coordination (x, y) of the  $\text{Ca}_5\text{Ga}_6\text{O}_{14}:x\text{Tb}^{3+}$  phosphors with different doping concentrations

| $\text{Tb}^{3+}$ doping concentrations | CIE-x | CIE-y |
|----------------------------------------|-------|-------|
| 0.02                                   | 0.328 | 0.485 |
| 0.04                                   | 0.339 | 0.519 |
| 0.06                                   | 0.338 | 0.529 |
| 0.08                                   | 0.342 | 0.538 |



---

**Table S3** The reported piezoelectric strain tensor  $d_{ij}$  in unite of pm/V

| Compound                                   | $d_{33}$ | $d_{31}$ | $d_{15}$ |
|--------------------------------------------|----------|----------|----------|
| AlN                                        | 5.4      | -2.1     | -2.9     |
| GaN                                        | 2.7      | -1.4     | -1.8     |
| $\epsilon$ -Ga <sub>2</sub> O <sub>3</sub> | 4.85     | -0.48    | 9.622    |

**Table S4** The reported piezoelectric stress tensor  $e_{ij}$  in unite of  $10^{-10}\text{C}/\text{m}^2$

| Compound                                   | $e_{33}$ | $e_{31}$ | $e_{15}$ |
|--------------------------------------------|----------|----------|----------|
| AlN                                        | 1.61     | -0.65    | -0.34    |
| ZnO                                        | 1.33     | -0.65    | -0.49    |
| GaN                                        | 0.67     | -0.37    | -0.23    |
| $\epsilon$ -Ga <sub>2</sub> O <sub>3</sub> | 0.941    | 0.011    | 0.595    |
